# Supplementary material
Source: PubMed Central journal article supplement (PMC6290104)
Supplement: ba018168-suppl1.pdf [file ba018168-suppl1.pdf]

**Supplementary Figure 1. LCL-161 synergizes with etoposide and vincristine in RRCL models.** a) CI values for LCL-161 and vincristine show mostly additive (CI=1) or antagonistic (CI>1) interactions in the Raji cell line. b) Stronger synergy in the Raji 4RH cell line. c) Antagonism was observed between LCL-161 and etoposide in the Raji cell line at all concentrations tested; d) however, synergy was observed between etoposide and LCL-161 in the Raji 4RH cell line, suggesting combinations of LCL-161 and etoposide are more active in RRCLs.

**Supplementary Figure 2. LCL-161 does not increase rituximab activity *in vivo*.** Animals were inoculated with  $1 \times 10^6$  Raji cells or  $10 \times 10^6$  Raji 4RH cells. Treatment was administered 7 days after xenograft implantation. Treatment groups were rituximab alone (10mg/kg IV), LCL-161 alone (60mg/kg orally), or a combination of LCL-161 and rituximab given according to the above listed doses and routes of administration. LCL-161 and rituximab were given on day 7. No statistically significant difference in survival was observed between the LCL-161 and LCL-161 + rituximab treatment arms in either cell line model.

**Supplementary Figure 3. LCL-161 does not increase carfilzomib activity *in vivo*.** Animals were inoculated with  $10 \times 10^6$  Raji 4RH cells. Treatment was administered 7 days after xenograft implantation. Treatment groups were LCL-161 alone (60mg/kg orally), carfilzomib alone (2mg/kg IV), or a combination of LCL-161 and carfilzomib given according to the above listed doses and routes of administration. LCL-161 was given on day 7, while carfilzomib was given on days 7 and 8. No treatment arms were statistically distinct from any other treatment arms.

**Supplementary Figure 4. Statistical significance values and patient demographics for all samples in the LCL-161 *ex vivo* studies.** a) A statistical comparison of anti-tumor responses in *ex vivo* patient samples. P values are for the comparison of 5nM carfilzomib to 5nM carfilzomib + 10uM LCL-161. b) Descriptive statistics of the patient population that *ex vivo* samples were collected from.

**Figure S1**

a.

**Raji LCL-161 + Vincristine (Vin) CI values**

|             | Vin 0.1nM | Vin 0.5nM | Vin 1nM |
|-------------|-----------|-----------|---------|
| LCL161 10uM | 1.841     | 5.908     | 1.214   |
| LCL161 25uM | 3.076     | 0.997     | 1.061   |
| LCL161 35uM | 0.564     | 0.979     | 0.967   |

b.

**Raji 4RH LCL-161 + Vincristine (Vin) CI values**

|             | Vin 0.1nM | Vin 0.5nM | Vin 1nM |
|-------------|-----------|-----------|---------|
| LCL161 10uM | 5.512     | 0.878     | 0.815   |
| LCL161 25uM | 0.749     | 0.399     | 0.385   |
| LCL161 35uM | 0.498     | 0.576     | 0.432   |

c.

**Raji LCL-161 + Etoposide (Eto) CI values**

|             | Eto 1uM | Eto 2.5uM | Eto 5uM |
|-------------|---------|-----------|---------|
| LCL161 10uM | 5.69    | 2.24      | 1.944   |
| LCL161 25uM | 2.44    | 3.009     | 2.895   |
| LCL161 35uM | 1.465   | 1.766     | 1.755   |

d.

**Raji 4RH LCL-161 + Etoposide (Eto) CI values**

|             | Eto 1uM | Eto 2.5uM | Eto 5uM |
|-------------|---------|-----------|---------|
| LCL161 10uM | >10     | >10       | 1.172   |
| LCL161 25uM | 1.071   | 1.48      | 0.326   |
| LCL161 35uM | 1.971   | 0.551     | 0.232   |

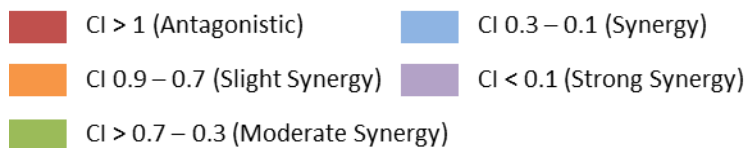

Figure S2

### Raji

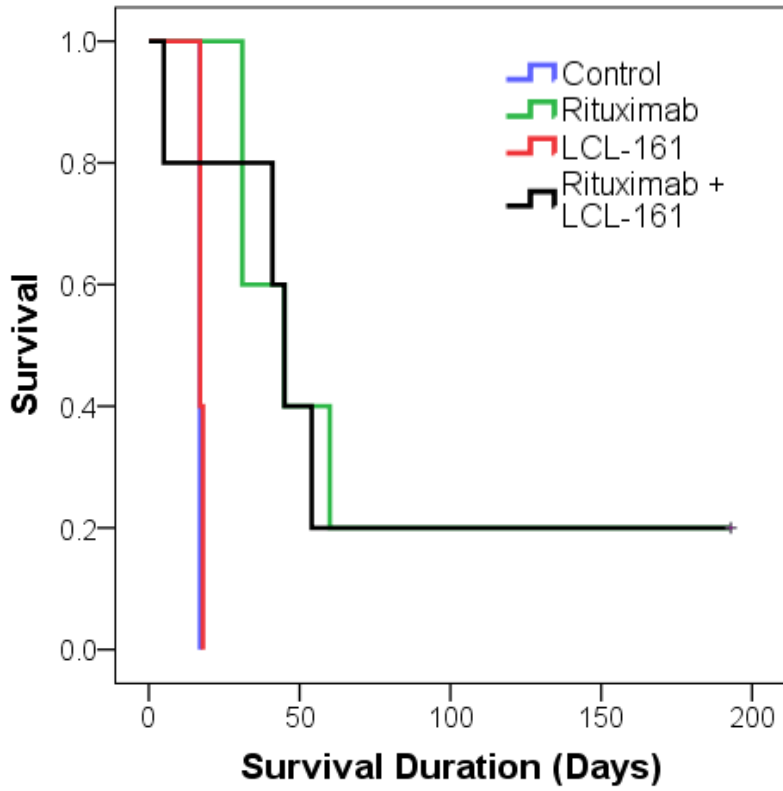

### Raji 4RH

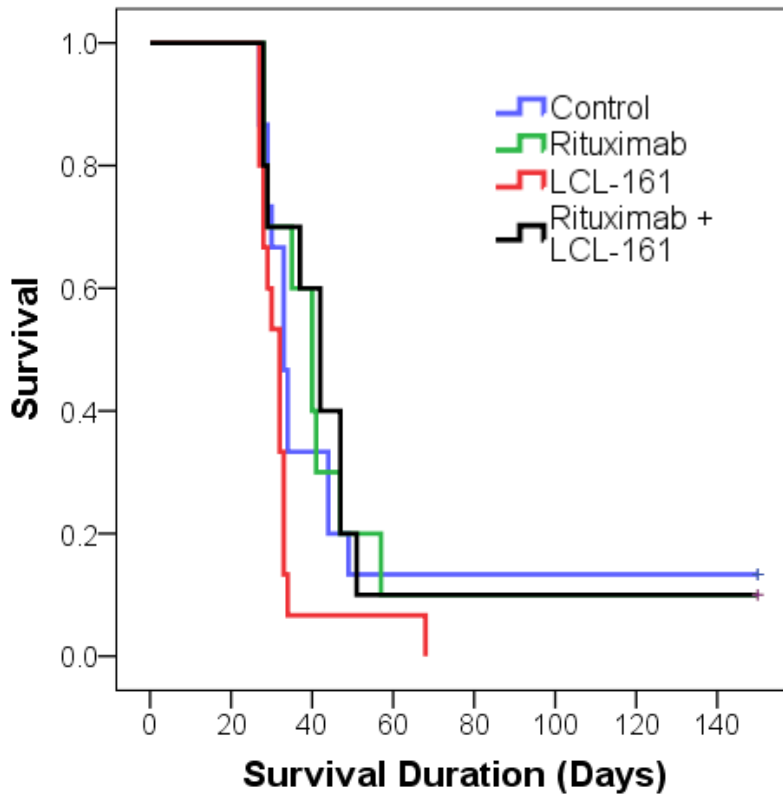

Figure S3

### Raji 4RH

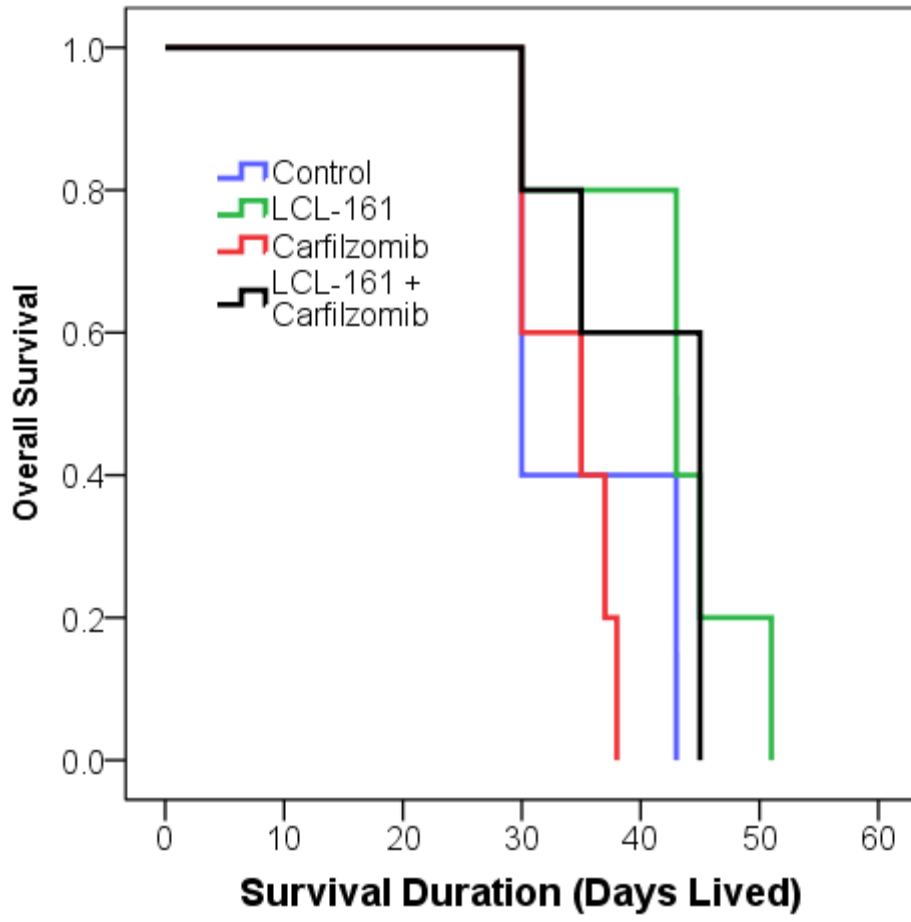

**Figure S4**

**a.**

| Patient Number | Diagnosis               | Biopsy Site | Age and Gender | Prior Therapy                         | Lifetime Rituximab (mg/m <sup>2</sup> ) |
|----------------|-------------------------|-------------|----------------|---------------------------------------|-----------------------------------------|
| 141            | ABC-DLBCL               | Lung        | 20, M          | R-EPOCH, R-ICE, R-DHAC, HyperCVAD     | 3750                                    |
| 121            | FL, grade IIIA          | Tonsil      | 73, M          | None                                  | 0                                       |
| 109            | FL, grade IIIA          | Lymph node  | 71, M          | R-CHOP, R-Bendamustine                | 4500                                    |
| 123            | FL, grade I-II          | Lymph node  | 79, F          | None                                  | 0                                       |
| 127            | FL, grade not available | Lymph node  | 77, F          | R-fludarabine, R-doxil                | 4500                                    |
| 130            | FL, grade not available | Lymph node  | 69, F          | R-CHOP, R-fludarabine                 | 3375                                    |
| 139            | MZL                     | Spleen      | 67, F          | None                                  | 0                                       |
| 164            | MZL                     | Spleen      | 69, M          | None                                  | 0                                       |
| 110            | MZL                     | Spleen      | 51, F          | R-fludarabine                         | 2250                                    |
| 160            | MZL                     | Spleen      | 66, M          | Steroids                              | 0                                       |
| 128            | MCL                     | Lymph node  | 66, M          | None                                  | 0                                       |
| 137            | MCL                     | Blood       | 62, M          | None                                  | 0                                       |
| 138            | MCL                     | Bone marrow | 51, M          | None                                  | 0                                       |
| 165            | MCL                     | Lymph node  | 39, M          | None                                  | 0                                       |
| 146            | MCL                     | Blood       | M, 56          | R-hyperCVAD, HDC-ASCT, BTZ, Ibrutinib | 2250                                    |

**b.**

|                                    |            |
|------------------------------------|------------|
| Number of Cases                    | 15         |
| Median age, years (Range)          | 61 (20-79) |
| Sex: M/F                           | 10/5       |
| Disease Status<br>•De Novo/Relapse | 7/8        |

ABC-DLBCL: Activated B-cell diffuse large B-cell lymphoma, FL: Follicular lymphoma, MZL: Marginal zone lymphoma, MCL: Mantle cell lymphoma, R-EPOCH: Rituximab, Etoposide phosphate, Prednisone, Vincristine sulfate, Cyclophosphamide, and Doxorubicin hydrochloride, R-ICE: Rituximab, Ifosfamide, Carboplatin and Etoposide, R-DHAC: Rituximab, Dexamethasone and high-dose Cytarabine, HyperCVAD: Cyclophosphamide, Vincristine, Doxorubicin and Dexamethasone, HDC-ASCT: high-dose chemotherapy and autologous stem cell transplantation, BTZ: Bortezomib, M: Male, F: Female
